# Supplementary material for: Self-assembly of a g-C3N4-based 3D aerogel induced by N-modified carbon dots for enhanced photocatalytic hydrogen production
Source: Royal Society of Chemistry journal article supplement (doi:10.1039/d1ta06437a), 2021-01-01
Supplement: d1ta06437a1.pdf [file d1ta06437a1.pdf]

## Supporting Information

### Self-assembly of g-C<sub>3</sub>N<sub>4</sub>-based 3D aerogel induced by N-doped carbon dots for enhanced photocatalytic hydrogen production

Xiao-Long Pu<sup>a</sup>, Xue-Chun Yang<sup>a, \*</sup>, Shan-Shan Liang<sup>a</sup>, Wenzhong Wang<sup>b</sup>, Jing-Tai Zhao<sup>a</sup>, Zhi-Jun Zhang<sup>a, \*</sup>

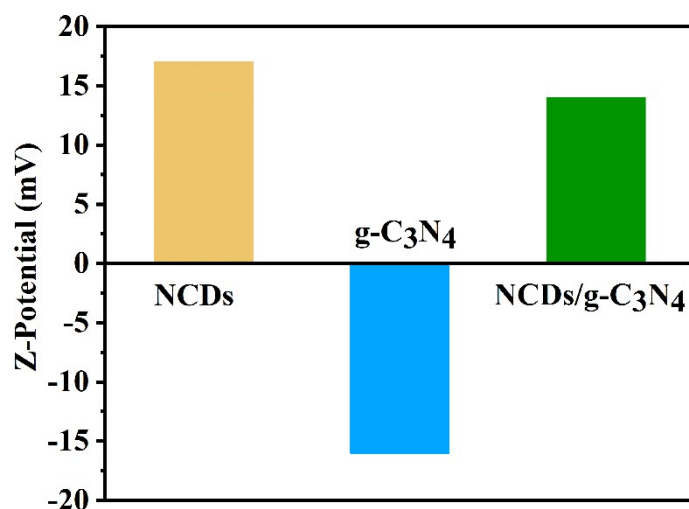

Fig. S1 Z-potential of NCDs, g-C<sub>3</sub>N<sub>4</sub> and NCDs/g-C<sub>3</sub>N<sub>4</sub> aerogel.

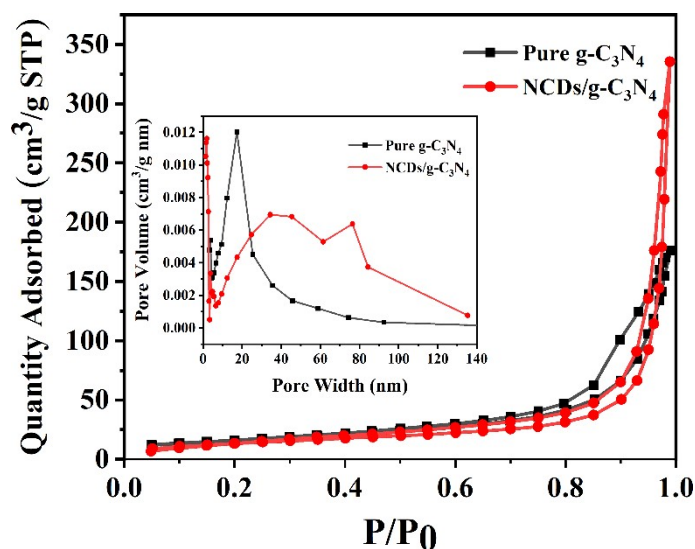

Fig. S2 N<sub>2</sub> adsorption and desorption isotherms (insert: pore volume distribution) of g-C<sub>3</sub>N<sub>4</sub> and NCDs/g-C<sub>3</sub>N<sub>4</sub> aerogel.

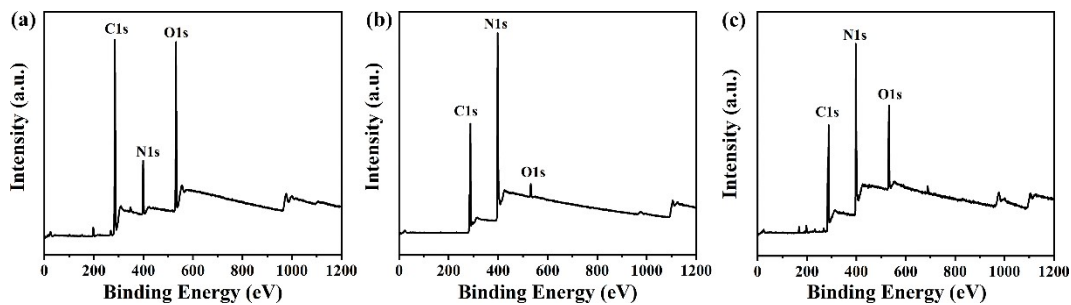

Fig. S3 Survey XPS spectra of (a) NCDs, (b)  $g\text{-C}_3\text{N}_4$  and (c) NCDs/ $g\text{-C}_3\text{N}_4$  aerogel.

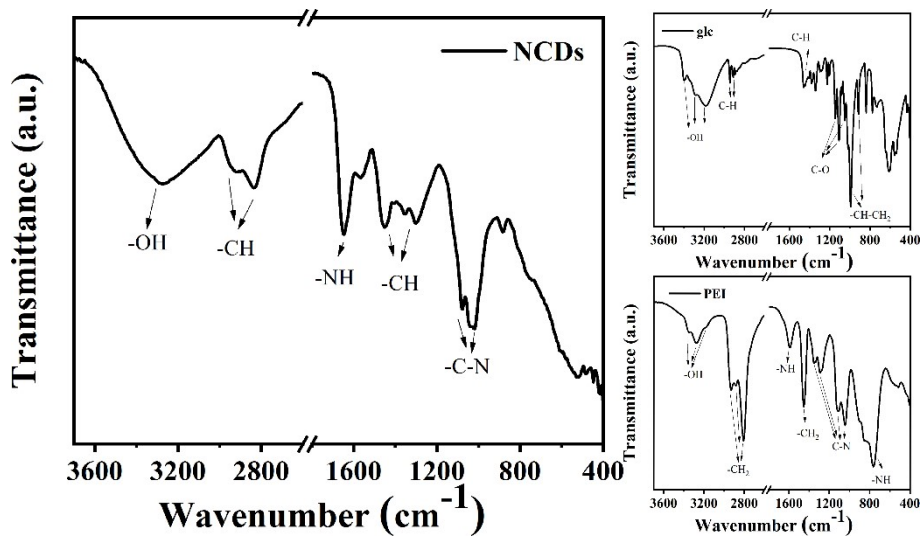

Fig. S4 FT-IR spectra of NCDs and their precursors.

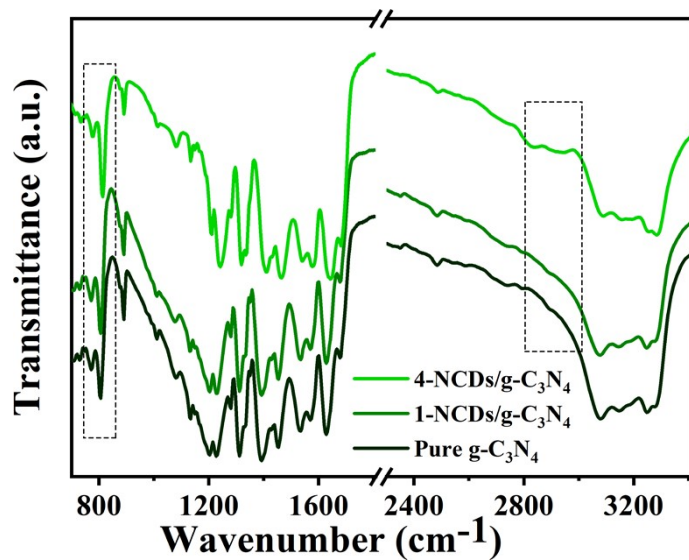

Fig. S5 FT-IR spectra of pure  $g\text{-C}_3\text{N}_4$  and NCDs/ $g\text{-C}_3\text{N}_4$  aerogel.

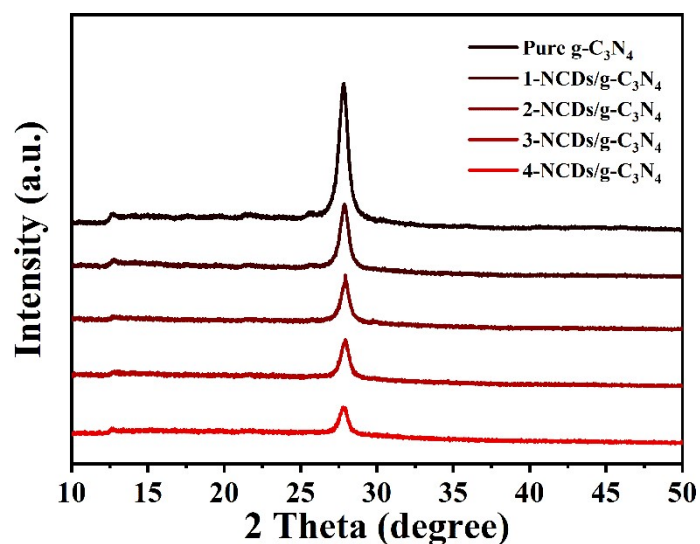

Fig. S6 XRD patterns of pure  $g\text{-C}_3\text{N}_4$  and NCDs/ $g\text{-C}_3\text{N}_4$  aerogel.

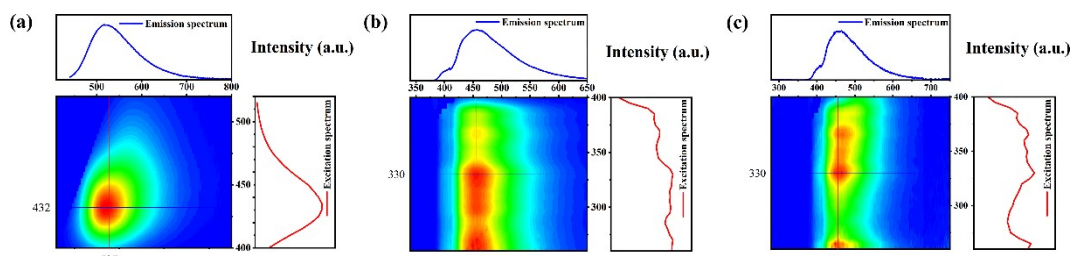

Fig. S7 The 3D PL spectra of (a) NCDs, (b)  $g\text{-C}_3\text{N}_4$  and (c) NCDs/ $g\text{-C}_3\text{N}_4$  aerogel.

Table S1: Results for photocatalytic  $\text{H}_2$  production.

| Sample   | Photocatalyst                                     | $\text{H}_2$ production<br>( $\mu\text{mol h}^{-1}$ ) | $\text{H}_2$ evolution rate<br>( $\mu\text{mol h}^{-1} \text{g}^{-1}$ ) |
|----------|---------------------------------------------------|-------------------------------------------------------|-------------------------------------------------------------------------|
| 0        | Pure $g\text{-C}_3\text{N}_4$                     | 34211.3                                               | 8552.8                                                                  |
| 1        | 1-NCDs/ $g\text{-C}_3\text{N}_4$                  | 38641.6                                               | 9660.4                                                                  |
| 2        | 2-NCDs/ $g\text{-C}_3\text{N}_4$                  | 45276.7                                               | 11319.1                                                                 |
| <b>3</b> | <b>3-NCDs/<math>g\text{-C}_3\text{N}_4</math></b> | <b>53996</b>                                          | <b>13499</b>                                                            |
| 4        | 4-NCDs/ $g\text{-C}_3\text{N}_4$                  | 23897.3                                               | 5974.3                                                                  |

Table S2: Comparisons of photocatalytic  $\text{H}_2$  performance for previously reported catalysts.

| Photocatalysts                                     | Cocatalysts   | Reactant solution and sacrificial reagents | Light source  | H <sub>2</sub> evolution rate (μmol h <sup>-1</sup> g <sup>-1</sup> ) | AQE (%)      | Ref       |
|----------------------------------------------------|---------------|--------------------------------------------|---------------|-----------------------------------------------------------------------|--------------|-----------|
| Ag/CDs/g-C <sub>3</sub> N <sub>4</sub>             | Ag (3 wt%)    | Water (60 mL) and TEOA (10 mL)             | 300 W Xe lamp | 629                                                                   | 4.81 (420nm) | 1         |
| P-CNG-Pt                                           | Pt (9.3 wt%)  | Water (42.5 mL) and TEOA (7.5 mL)          | 300 W Xe lamp | 2566                                                                  | 21.6 (420nm) | 2         |
| ZCNQ40                                             | Pt (5 wt%)    | Water (80 mL) and TEOA (20 mL)             | 500 W Xe lamp | 4368                                                                  | /            | 3         |
| Pt SAs/C <sub>3</sub> N <sub>4</sub>               | Pt (0.91 wt%) | Water (80 mL) and TEOA (20 mL)             | 300 W Xe lamp | 10472                                                                 | /            | 4         |
| Highly crystalline g-C <sub>3</sub> N <sub>4</sub> | Pt (3 wt%)    | Water (90 mL) and TEOA (10 mL)             | 300 W Xe lamp | 9577                                                                  | 9.01 (420nm) | 5         |
| pd/g-CN                                            | Pd (0.96 wt%) | Water (72 mL) and TEOA (8 mL)              | 300 W Xe lamp | 6688                                                                  | 4 (420nm)    | 6         |
| NCDs/g-C <sub>3</sub> N <sub>4</sub> aerogel       | Pt (1.5 wt%)  | Water (90 mL) and TEOA (10 mL)             | 300 W Xe lamp | 13499                                                                 | 7.6 (420nm)  | This work |

**Table S3:** Comparisons of photocatalytic H<sub>2</sub> performance for previously reported catalysts.

| Photocatalysts | Cocatalysts | Reactant solution and sacrificial reagents | Light source | H <sub>2</sub> evolution rate (μmol h <sup>-1</sup> g <sup>-1</sup> ) | Ref |
|----------------|-------------|--------------------------------------------|--------------|-----------------------------------------------------------------------|-----|
|----------------|-------------|--------------------------------------------|--------------|-----------------------------------------------------------------------|-----|

|                                              |              |                                                     |                                           |        |           |
|----------------------------------------------|--------------|-----------------------------------------------------|-------------------------------------------|--------|-----------|
| CoPi/g-C <sub>3</sub> N <sub>4</sub>         | Co           | 120mL of solution containing 25% methanol by volume | 300 W Xe lamp with a 400 nm cutoff filter | 194.8  | 7         |
| C-PDA/g-C <sub>3</sub> N <sub>4</sub>        | Pt (1.5 wt%) | 300mL of TEOA (10 vol %)                            | 300 W Xe lamp with a 400 nm cutoff filter | 811    | 8         |
| N self-doped g-C <sub>3</sub> N <sub>4</sub> | Pt (3 wt%)   | 100mL of TEOA (10 vol %)                            | 300 W Xe lamp with a 400 nm cutoff filter | 553.5  | 9         |
| g-C <sub>3</sub> N <sub>4</sub> nanosheets   | Pt (6 wt%)   | 300mL of TEOA (10 vol %)                            | 300 W Xe lamp with a 400 nm cutoff filter | 650    | 10        |
| CN aerogels                                  | Pd (3 wt%)   | 100mL of TEOA (10 vol %)                            | 300 W Xe lamp with a 420 nm cutoff filter | 600    | 11        |
| NCDs/g-C <sub>3</sub> N <sub>4</sub> aerogel | Pt (1.5 wt%) | Water (90 mL) and TEOA (10 mL)                      | 300 W Xe lamp with a 400 nm cutoff filter | 1827.5 | This work |

## References

1. J. Qin and H. Zeng, *Appl. Catal. B-Environ.*, 2017, **209**, 161-173.
2. W. Li, X.-s. Chu, F. Wang, Y.-y. Dang, X.-y. Liu, X.-c. Wang and C.-y. Wang, *Appl. Catal. B-Environ.*, 2021, **288**, 120034.
3. P. Xing, F. Zhou and S. Zhan, *Environ. Res.*, 2021, **197**, 111167.
4. Y. Hu, Y. Qu, Y. Zhou, Z. Wang, H. Wang, B. Yang, Z. Yu and Y. Wu, *Chem. Eng. J.*, 2021, **412**, 128749.
5. W. Iqbal, B. Qiu, Q. Zhu, M. Xing and J. Zhang, *Appl. Catal. B-Environ.*, 2018, **232**, 306-313.
6. S. W. Cao, H. Li, T. Tong, H. C. Chen, A. C. Yu, J. G. Yu and H. M. Chen, *Adv. Funct. Mater.*, 2018, **28**, 9.
7. L. Ge, C. Han, X. Xiao and L. Guo, *Appl. Catal. B-Environ.*, 2013, **142-143**, 414-422.
8. F. He, G. Chen, Y. Yu, Y. Zhou, Y. Zheng and S. Hao, *ChemComm*, 2015, **51**, 6824-6827.
9. J. Fang, H. Fan, M. Li and C. Long, *Adv. Funct. Mater.*, 2015, **3**, 13819-13826.

10. P. Niu, L. Zhang, G. Liu and H.-M. Cheng, *Adv. Funct. Mater.*, 2012, **22**, 4763-4770.
11. H. Ou, P. Yang, L. Lin, M. Anpo and X. Wang, *Angew Chem Int Ed.*, 2017, **56**, 10905-10910.
